# Supplementary material for: Biomarker Discovery for Hepatocellular Carcinoma in Patients with Liver Cirrhosis Using Untargeted Metabolomics and Lipidomics Studies
Source: MDPI journal article supplement (doi:10.3390/metabo13101047), 2023-10-02
Supplement: s1 [file s1]

## **Supplementary Materials**

# **Biomarker Discovery for Hepatocellular Carcinoma in Patients with Liver Cirrhosis Using Untargeted Metabolomics and Lipidomics Studies**

**Md Mamunur Rashid, Rency S. Varghese, Yuansong Ding and Habtom W. Ressom \***

Lombardi Comprehensive Cancer Center, Department of Oncology, Georgetown University Medical Center, Georgetown University, Washington, DC 20057, USA;  
mr1785@georgetown.edu (M.M.R.); rsv4@georgetown.edu (R.S.V.);  
yd239@georgetown.edu (Y.D.)

\* Correspondence: hwr@georgetown.edu

**Supplementary Table S1.** Evaluated area under the receiver operating characteristic curve (AUC) of individual biomarker candidates for HCC identified by metabolomics study.

| Metabolites                     | AUC   |
|---------------------------------|-------|
| N-Nonanoylglycine               | 0.825 |
| N-Undecanoylglycine             | 0.800 |
| Histidylalanine                 | 0.778 |
| 4-Dodecylbenzenesulfonic acid   | 0.772 |
| $\alpha$ -Aspartylphenylalanine | 0.772 |
| PE(16:0/18:2); PE(34:2)         | 0.769 |
| PE(O-16:1/18:2); PE(O-34:3)     | 0.769 |
| L-Carnitine                     | 0.767 |
| L-Alanine                       | 0.764 |
| 2-Hydroxymyristic acid          | 0.761 |
| PE(18:1/20:4); PE(38:5)         | 0.758 |
| 2-Linoleoyl Glycerol            | 0.756 |
| PE(O-16:1/20:4); PE(O-36:5)     | 0.744 |
| PE(O-16:1/22:6); PE(O-38:7)     | 0.736 |
| LysoPE(18:2/0:0); LPE(18:2)     | 0.736 |
| LysoPE(18:3/0:0); LPE(18:3)     | 0.728 |
| Prostaglandin A2                | 0.722 |
| Pyruvic acid                    | 0.717 |
| Testosterone sulfate            | 0.711 |
| Nervonic acid                   | 0.697 |
| Indoleacrylic acid              | 0.697 |
| Cer(d18:1/16:0); Cer(d34:1)     | 0.694 |
| PE(18:1/18:2); PE(36:3)         | 0.694 |
| Xanthine                        | 0.689 |
| Thromboxane B2                  | 0.672 |
| Proline                         | 0.672 |
| Glycodeoxycholic acid           | 0.669 |
| Glycoursodeoxycholic acid       | 0.656 |
| Uric acid                       | 0.656 |
| Sebacic acid                    | 0.653 |
| Taurochenodeoxycholic Acid      | 0.642 |
| AFP                             | 0.626 |

**Supplementary Table S2.** Evaluated area under the receiver operating characteristic curve (AUC) of individual biomarker candidates for HCC identified by lipidomics study.

| Metabolites                   | AUC  |
|-------------------------------|------|
| Nonadecanoic acid             | 0.91 |
| 12,13-EpOME                   | 0.90 |
| Heneicosylic acid             | 0.89 |
| 2-Methylbenzoic acid          | 0.87 |
| PC(22:5/3:0); PC(25:5)        | 0.86 |
| PC(15:1/24:4); PC(39:5)       | 0.85 |
| Hexacosanoic acid             | 0.85 |
| DG(20:1/14:1/0:0); DG(34:2)   | 0.85 |
| PC(O-46:8)                    | 0.85 |
| TG(16:0/16:1/22:6); TG(54:7)  | 0.84 |
| Stearic acid                  | 0.84 |
| Tridecanoic acid              | 0.84 |
| Heptacosanoic acid            | 0.83 |
| Undecanoic acid               | 0.83 |
| Lauric acid/Dodecanoic acid   | 0.83 |
| Pentacosanoic acid            | 0.83 |
| Tricosanoic acid              | 0.81 |
| Palmitic acid                 | 0.81 |
| Arachidic acid                | 0.81 |
| alpha-Linolenic acid          | 0.81 |
| LPC(P-27:6)                   | 0.81 |
| PE(18:3/18:0); PE(36:3)       | 0.81 |
| PC(22:5/16:0); PC(38:5)       | 0.81 |
| PC(20:4/22:6); PC(42:10)      | 0.80 |
| 4-Hydroxybenzaldehyde         | 0.80 |
| Pentadecanoic acid            | 0.79 |
| 6-Hydroxynicotinic acid       | 0.79 |
| TG(18:3/18:2/20:5); TG(56:10) | 0.79 |
| 2-Hydroxypalmitic acid        | 0.79 |
| PC(15:1/22:6); PC(37:7)       | 0.78 |
| PC(20:3/22:6); PC(42:9)       | 0.77 |
| PC(18:0/22:0); PC(40:0)       | 0.77 |
| PC(16:0/22:6); PC(38:6)       | 0.71 |
| AFP                           | 0.63 |

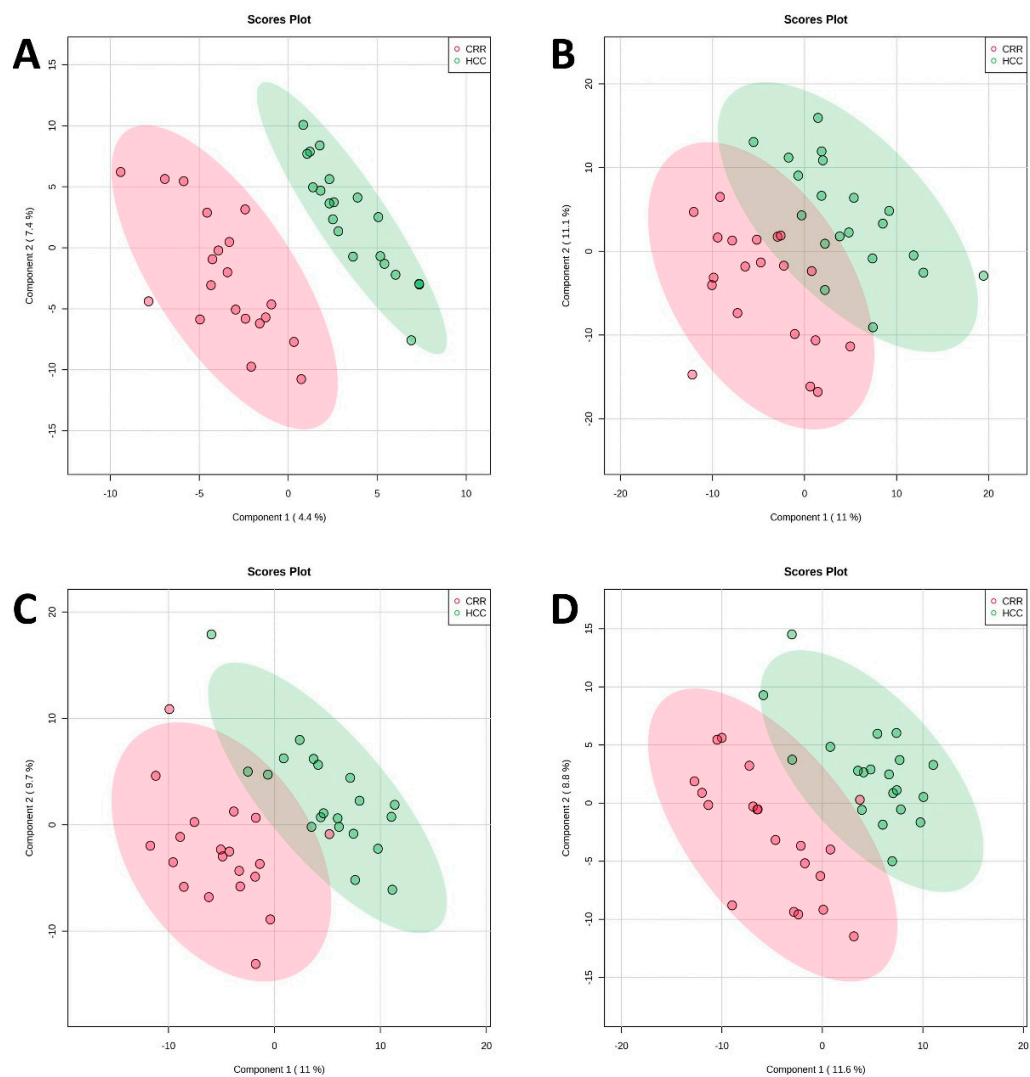

**Supplementary Figure S1.** Partial least squares discriminant analysis (PLS-DA) score plot of HCC (green) and cirrhosis (red) cohorts. Metabolomics (A) positive ( $R^2 = 0.99$ ,  $Q^2 = -0.04$ ) and (B) negative ( $R^2 = 0.98$ ,  $Q^2 = 0.08$ ) modes; Lipidomics (C) positive ( $R^2 = 0.98$ ,  $Q^2 = 0.31$ ) and (D) negative ( $R^2 = 0.98$ ,  $Q^2 = 0.24$ ) modes.

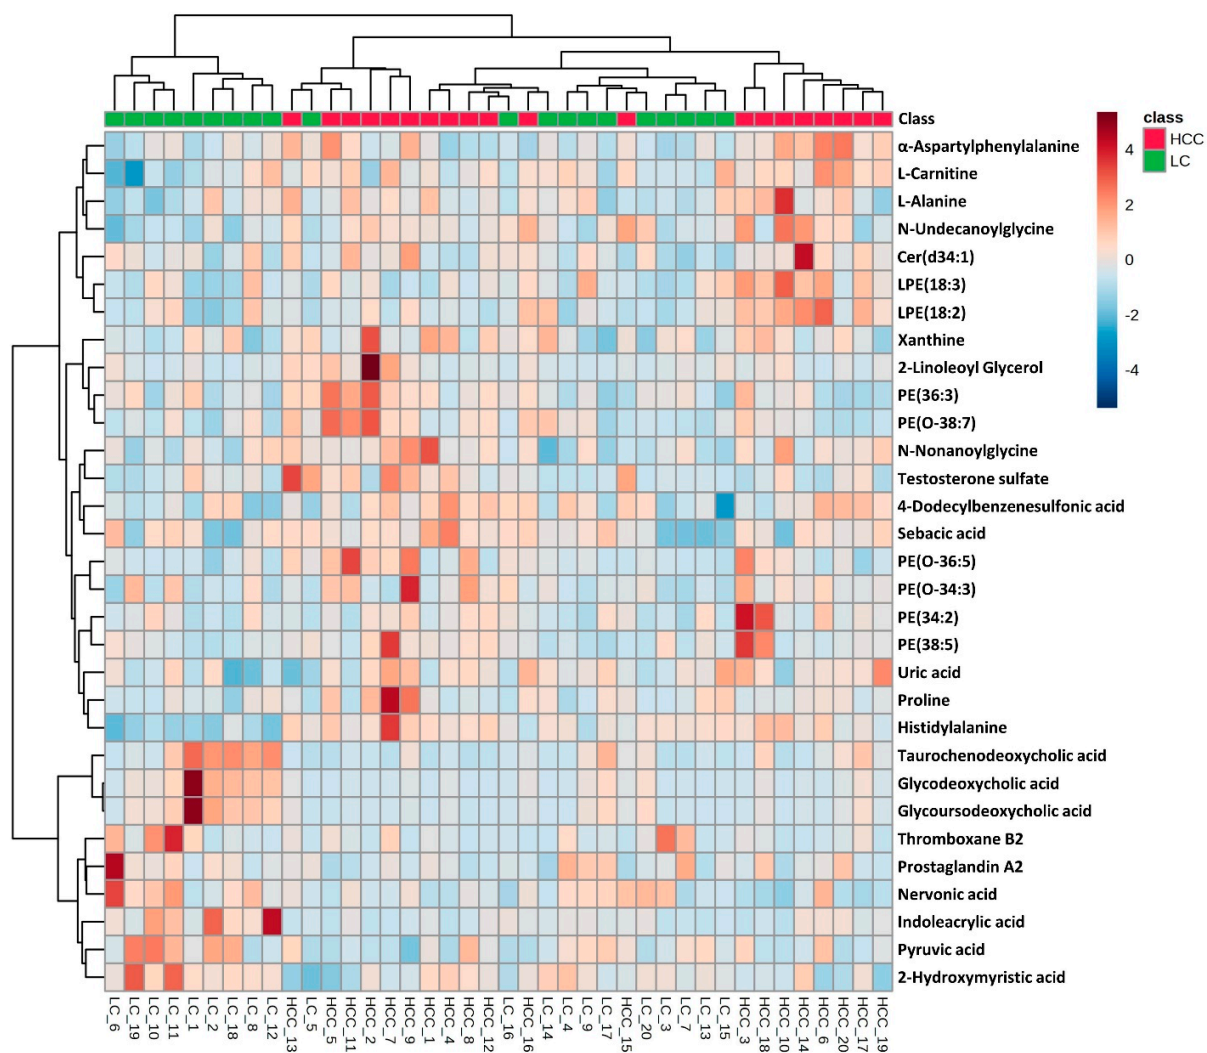

**Supplementary Figure S2.** Hierarchical clustering (both left and top) analysis (heatmap) of identified serum metabolites altered in HCC cohort compared to LC cohort in metabolomics study.

### Keto acids and Carboxylic acids and Derivatives

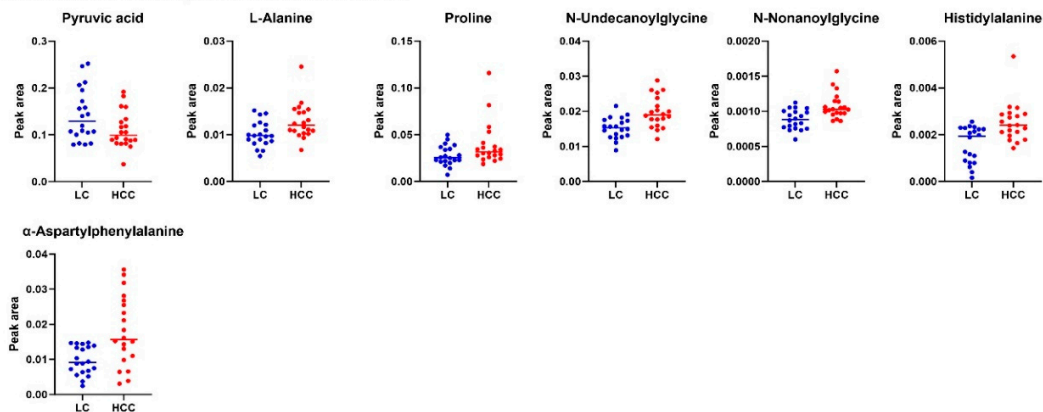

### Organic acids

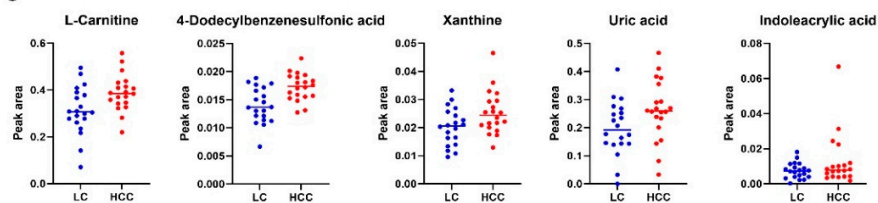

### Fatty acyls

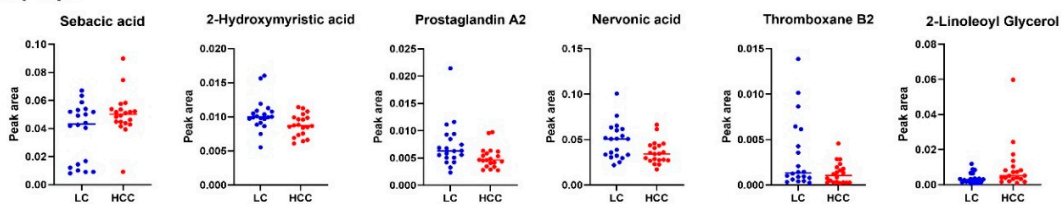

### Steroid and steroid derivatives

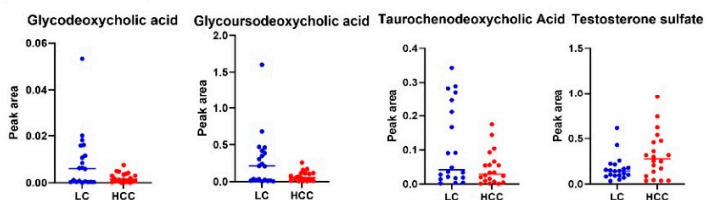

### Lipids

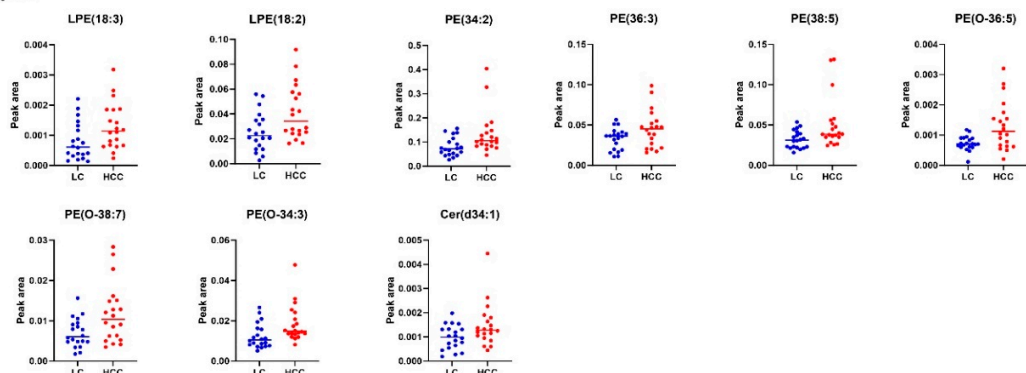

**Supplementary Figure S3.** Individual dot plots of significantly altered metabolites in HCC vs. LC identified by metabolomics study. Horizontal lines represent the median.

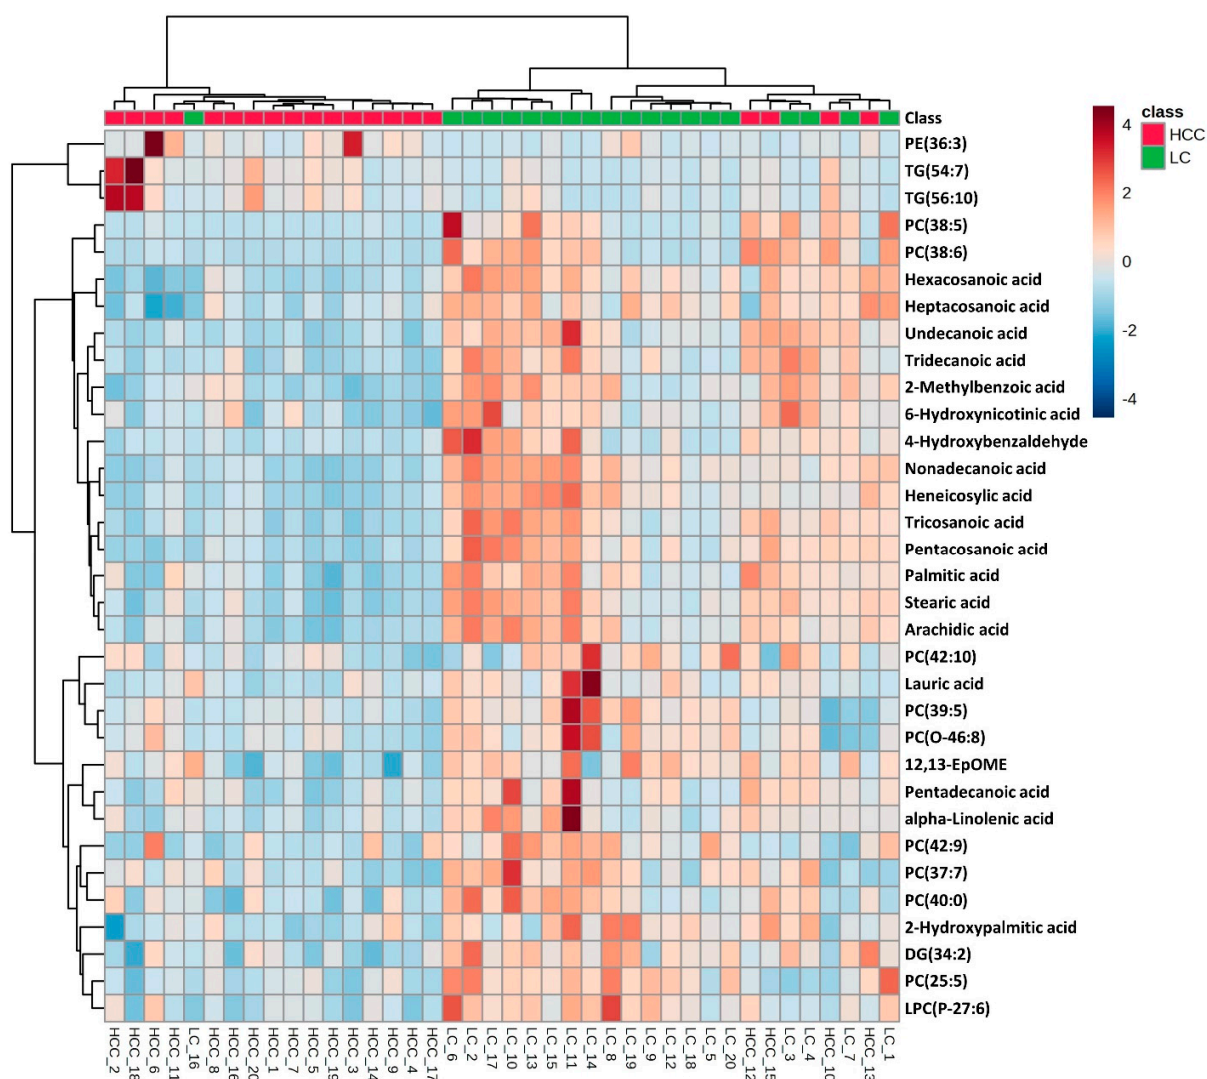

**Supplementary Figure S4.** Hierarchical clustering (both left and top) analysis (heatmap) of identified serum metabolites altered in HCC cohort compared to LC cohort in lipidomics study.

## Fatty acyls

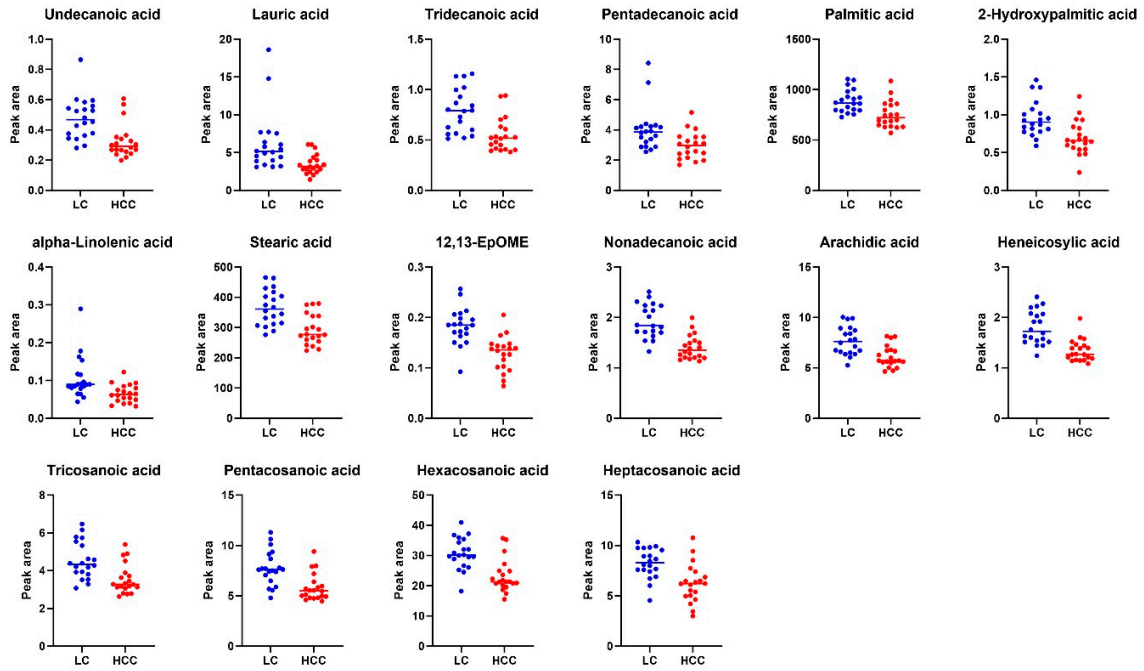

## Organic acids

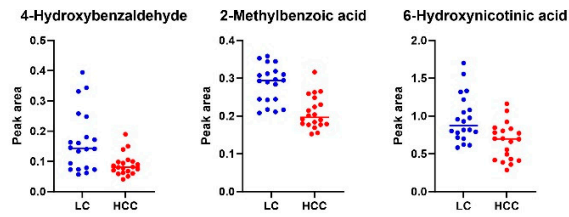

## Lipids

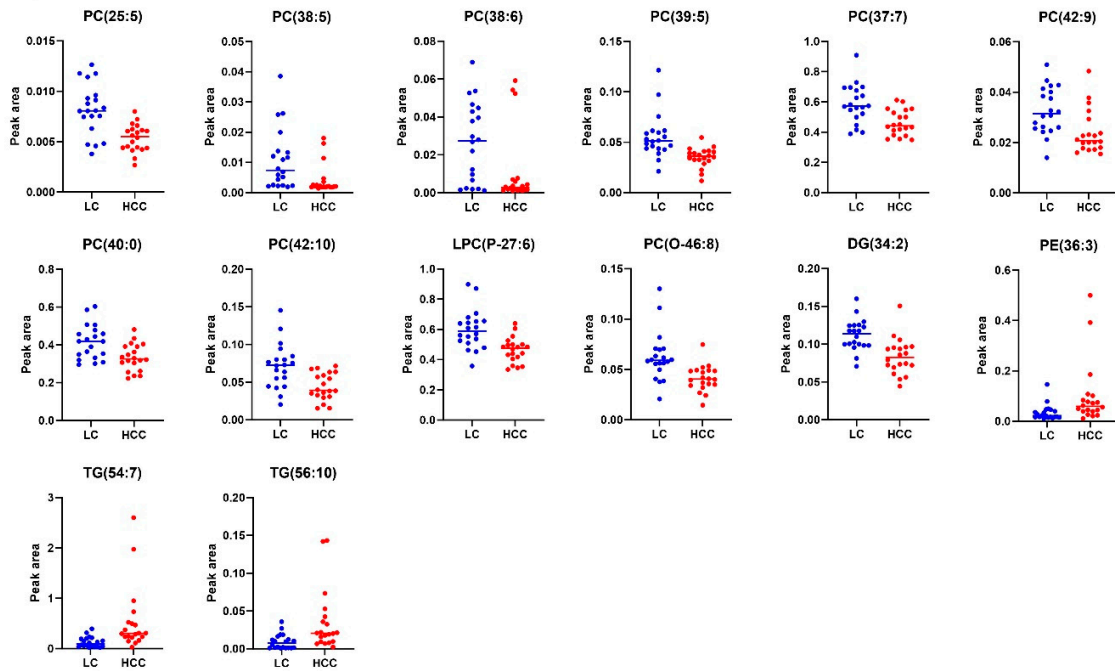



**Supplementary Figure S5.** Individual dot plots of significantly altered metabolites in HCC vs. LC identified by lipidomics study. Horizontal lines represent the median.
